# Supplementary material for: Systematic Review and Modelling of Age-Dependent Prevalence of Toxoplasma gondii in Livestock, Wildlife and Felids in Europe
Source: MDPI journal article supplement (doi:10.3390/pathogens12010097), 2023-01-06
Supplement: s1 [file s1]

**Supplementary tables to the article: “Systematic review and modelling of age-dependent prevalence of *Toxoplasma gondii* in livestock, wildlife and felids in Europe”**

Content of the file: Table S1: Countries within European regions; Table S2: List of other matrices; Table S3: Number of included studies and articles per animal species; Table S4: Direct prevalence estimates.

**Table S1:** Countries within European regions. Categorization of European countries into five European regions – Western, Northern, Eastern, Southeastern and Southwestern.

| Regions      | Countries                                                                                                              |
|--------------|------------------------------------------------------------------------------------------------------------------------|
| Western      | Austria, France, Germany, Ireland, Lichtenstein, Luxembourg, the Netherlands, Switzerland, the United Kingdom          |
| Northern     | Denmark, Estonia, Finland, Iceland, Norway, Sweden                                                                     |
| Eastern      | Belarus, the Czech Republic, Hungary, Latvia, Lithuania, Poland, Romania, Slovakia, Ukraine                            |
| Southeastern | Albania, Bosnia and Herzegovina, Bulgaria, Croatia, Cyprus, Greece, Kosovo, Moldova, North Macedonia, Serbia, Slovenia |
| Southwestern | Andorra, Italy, Malta, Portugal, San Marino, Spain                                                                     |

**Table S2:** List of other matrices. List of “other” matrices, not belonging to “blood” or “meat juice”, divided by the use of direct or indirect methods of detection. The names are provided as listed in included articles.

| Other matrices used with direct methods                                                           | Other matrices used with indirect methods |
|---------------------------------------------------------------------------------------------------|-------------------------------------------|
| Brain                                                                                             | Cardiac fluids                            |
| Diaphragm                                                                                         | Pleural fluids                            |
| Different tissues – heart, liver, mesenteric lymphnodes, mediastinal lymphnodes, diaphragm digest |                                           |
| Heart                                                                                             |                                           |
| Kidney                                                                                            |                                           |
| Liver                                                                                             |                                           |
| Milk                                                                                              |                                           |
| Musculus masseter                                                                                 |                                           |
| Organ                                                                                             |                                           |
| Skeletal muscle                                                                                   |                                           |
| Tissues                                                                                           |                                           |

**Table S3:** Number of included studies and articles per animal species. Publications are divided by the European region, testing method and animal species. The following format of “number of articles/number of animals” is used.

| Animal species | Test method | East     | Mix   | North   | Southeast | Southwest | West      | Total     |
|----------------|-------------|----------|-------|---------|-----------|-----------|-----------|-----------|
| Buffalo        | Direct      | 1/74     | 0/0   | 0/0     | 0/0       | 0/0       | 0/0       | 1/74      |
|                | Indirect    | 3/197    | 0/0   | 0/0     | 0/0       | 0/0       | 0/0       | 3/197     |
| Cattle         | Direct      | 2/163    | 1/151 | 0/0     | 0/0       | 0/0       | 9/1096    | 12/1410   |
|                | Indirect    | 19/12631 | 1/234 | 0/0     | 0/0       | 5/962     | 21/6118   | 46/19945  |
| Felids         | Direct      | 3/71     | 0/0   | 4/467   | 0/0       | 8/1428    | 15/104321 | 30/106287 |
|                | Indirect    | 13/1755  | 0/0   | 9/2426  | 0/0       | 45/3943   | 14/1987   | 81/10111  |
| Goat           | Direct      | 2/89     | 0/0   | 0/0     | 0/0       | 0/0       | 0/0       | 2/89      |
|                | Indirect    | 7/1011   | 0/0   | 1/2188  | 7/2107    | 8/3695    | 1/1664    | 24/10665  |
| Equids         | Direct      | 1/82     | 0/0   | 0/0     | 3/105     | 0/0       | 0/0       | 4/187     |
|                | Indirect    | 8/802    | 0/0   | 0/0     | 6/1230    | 16/1765   | 0/0       | 30/3797   |
| Lagomorphs     | Direct      | 0/0      | 0/0   | 0/0     | 1/52      | 1/144     | 1/57      | 3/253     |
|                | Indirect    | 5/2430   | 0/0   | 2/215   | 1/105     | 11/865    | 3/954     | 22/4569   |
| Pig            | Direct      | 7/1404   | 0/0   | 0/0     | 1/44      | 6/1122    | 5/385     | 19/2955   |
|                | Indirect    | 18/10633 | 0/0   | 6/3695  | 2/791     | 36/17658  | 23/16585  | 85/49362  |
| Poultry        | Direct      | 0/0      | 0/0   | 0/0     | 0/0       | 0/0       | 0/0       | 0/0       |
|                | Indirect    | 10/1307  | 0/0   | 0/0     | 0/0       | 4/653     | 17/6963   | 31/8923   |
| Sheep          | Direct      | 2/107    | 0/0   | 0/0     | 1/1       | 0/0       | 5/730     | 8/838     |
|                | Indirect    | 8/4975   | 0/0   | 1/1940  | 5/2849    | 18/15057  | 25/14206  | 57/39027  |
| Wild birds     | Direct      | 2/630    | 0/0   | 0/0     | 0/0       | 1/5       | 0/0       | 3/635     |
|                | Indirect    | 0/0      | 0/0   | 0/0     | 1/72      | 14/2562   | 1/4       | 16/2638   |
| Wild boars     | Direct      | 4/509    | 0/0   | 0/0     | 0/0       | 6/703     | 1/150     | 11/1362   |
|                | Indirect    | 15/3477  | 0/0   | 10/1899 | 0/0       | 26/4869   | 26/4719   | 77/14964  |
| Wild ruminants | Direct      | 0/0      | 0/0   | 0/0     | 0/0       | 7/237     | 4/124     | 11/361    |
|                | Indirect    | 13/2014  | 0/0   | 25/6153 | 0/0       | 34/4569   | 37/2870   | 109/15606 |

**Table S4:** Direct prevalence estimates. Average weighted prevalence estimates for selected animal species, reported separately for different sample matrices used. Results of the meta-analysis for the results reported using direct methods with prevalence outcomes in % (with 95% CI in brackets) are sorted by region, animal species, sample type (matrix). Total number of animals for each animal category, region and sample type is represented in the column “n\_tot”.

| Region    | Species        | Sample type | Prevalence             | n_tot  |
|-----------|----------------|-------------|------------------------|--------|
| East      | Buffalo        | Other       | 0.00% (0.00%,4.86%)    | 74     |
| East      | Cattle         | Other       | 6.13% (2.98%,10.99%)   | 163    |
| West      | Cattle         | Muscle      | 3.38% (2.17%,4.98%)    | 711    |
| West      | Cattle         | Other       | 2.08% (0.90%,4.05%)    | 385    |
| East      | Equids         | Other       | 0.00% (0.00%,4.40%)    | 82     |
| Southeast | Equids         | Other       | 1.90% (0.23%,6.71%)    | 105    |
| East      | Felids         | Feces       | 1.41% (0.04%,7.60%)    | 71     |
| North     | Felids         | Feces       | 0.17% (0.00%,0.93%)    | 598    |
| Southwest | Felids         | Feces       | 3.36% (2.49%,4.43%)    | 1429   |
| Southwest | Felids         | Other       | 6.67% (0.17%,31.95%)   | 15     |
| West      | Felids         | Feces       | 0.15% (0.13%,0.18%)    | 104309 |
| West      | Felids         | Other       | 33.33% (9.92%,65.11%)  | 12     |
| East      | Goat           | Other       | 38.20% (28.10%,49.11%) | 89     |
| Southeast | Lagomorphs     | Other       | 0.00% (0.00%,6.85%)    | 52     |
| Southwest | Lagomorphs     | Other       | 0.69% (0.02%,3.81%)    | 144    |
| West      | Lagomorphs     | Other       | 68.42% (54.76%,80.09%) | 57     |
| East      | Pig            | Blood       | 25.53% (17.09%,35.57%) | 94     |
| East      | Pig            | Muscle      | 7.48% (6.11%,9.04%)    | 1310   |
| Southeast | Pig            | Muscle      | 0.00% (0.00%,8.04%)    | 44     |
| Southwest | Pig            | Muscle      | 19.61% (17.32%,22.05%) | 1122   |
| Southwest | Pig            | Other       | 47.66% (37.92%,57.54%) | 107    |
| West      | Pig            | Muscle      | 5.97% (3.82%,8.83%)    | 385    |
| East      | Sheep          | Blood       | 6.25% (2.06%,13.99%)   | 80     |
| East      | Sheep          | Other       | 9.35% (4.57%,16.52%)   | 107    |
| Southeast | Sheep          | Other       | 33.33% (4.33%,77.72%)  | 6      |
| West      | Sheep          | Muscle      | 8.19% (6.20%,10.58%)   | 647    |
| West      | Sheep          | Other       | 3.61% (0.75%,10.20%)   | 83     |
| East      | Wild Birds     | Muscle      | 1.11% (0.45%,2.28%)    | 630    |
| East      | Wild Birds     | Other       | 2.38% (1.34%,3.90%)    | 630    |
| Southwest | Wild Birds     | Other       | 0.00% (0.00%,52.18%)   | 5      |
| East      | Wild Boar      | Blood       | 4.42% (1.45%,10.02%)   | 113    |
| East      | Wild Boar      | Muscle      | 8.84% (6.23%,12.08%)   | 396    |
| Southwest | Wild Boar      | Muscle      | 16.19% (9.72%,24.65%)  | 105    |
| Southwest | Wild Boar      | Other       | 23.58% (20.23%,27.19%) | 598    |
| West      | Wild Boar      | Muscle      | 0.67% (0.02%,3.66%)    | 150    |
| Southwest | Wild Ruminants | Muscle      | 1.92% (0.40%,5.52%)    | 156    |
| Southwest | Wild Ruminants | Other       | 22.90% (16.02%,31.05%) | 131    |
| West      | Wild Ruminants | Other       | 4.03% (1.32%,9.16%)    | 124    |
